# Supplementary material for: A Network Meta-analysis and Systematic Review of Left Bundle Branch Pacing, His Bundle Pacing, Biventricular Pacing or RV Pacing in Patients Requiring Permanent Pacemaker
Source: Research Square preprint supplement (doi:10.21203/rs.3.rs-185029/v1), 2021-02-12
Supplement: Supplementary file 1 [file d1b970ea30c8ae4217c106de.docx]

**Online supplementary data**

Supplementary to: A Network Meta-analysis and Systematic Review of Left Bundle Branch Pacing, His Bundle Pacing, Biventricular Pacing or RV Pacing in Patients requiring Permanent Pacemaker

Author: Nithi Tokavanich MD, Narut Prasitlumkum MD, Wimwipa Mongkonsritragoon MD, Wisit Cheungpasitporn, MD, Charat Thongprayoon, MD, Saraschandra Vallabhajosyula, MD MSc, Ronpichai Chokesuwattanaskul MD1*

This supplementary data provided the result of authors’ search strategy and result.

Online supplementary data 1


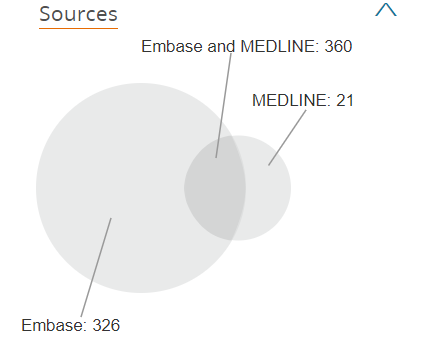


Session Results

.......................................................

No. Query Results

#19. #10 OR #11 OR #12 OR #13 OR #14 OR #17 OR #18 707

#18. #2 AND #4 27

#17. #2 AND #15 19

#16. #4 AND #15 6

#15. #5 OR #8 31,764

#14. #2 AND #9 12

#13. #4 AND #9 27

#12. #5 AND #9 309

#11. #6 AND #9 27

#10. #8 AND #9 641

#9. 'right ventricular pacing' 2,145

#8. 'cardiac resynchronization therapy' 31,261

#6. 'chronic resynchornization' 27

#5. 'biventricular pacing' 2,983

#4. 'left bundle branch block pacing' OR 'lbb 7

pacing'

#3. left AND bundle AND branch AND block AND pacing 3,670

#2. 'his pacing' 76
